# Supplementary material
Source: PubMed Central journal article supplement (PMC5481647)
Supplement: BPH-174-2209-s001.pdf [file BPH-174-2209-s001.pdf]

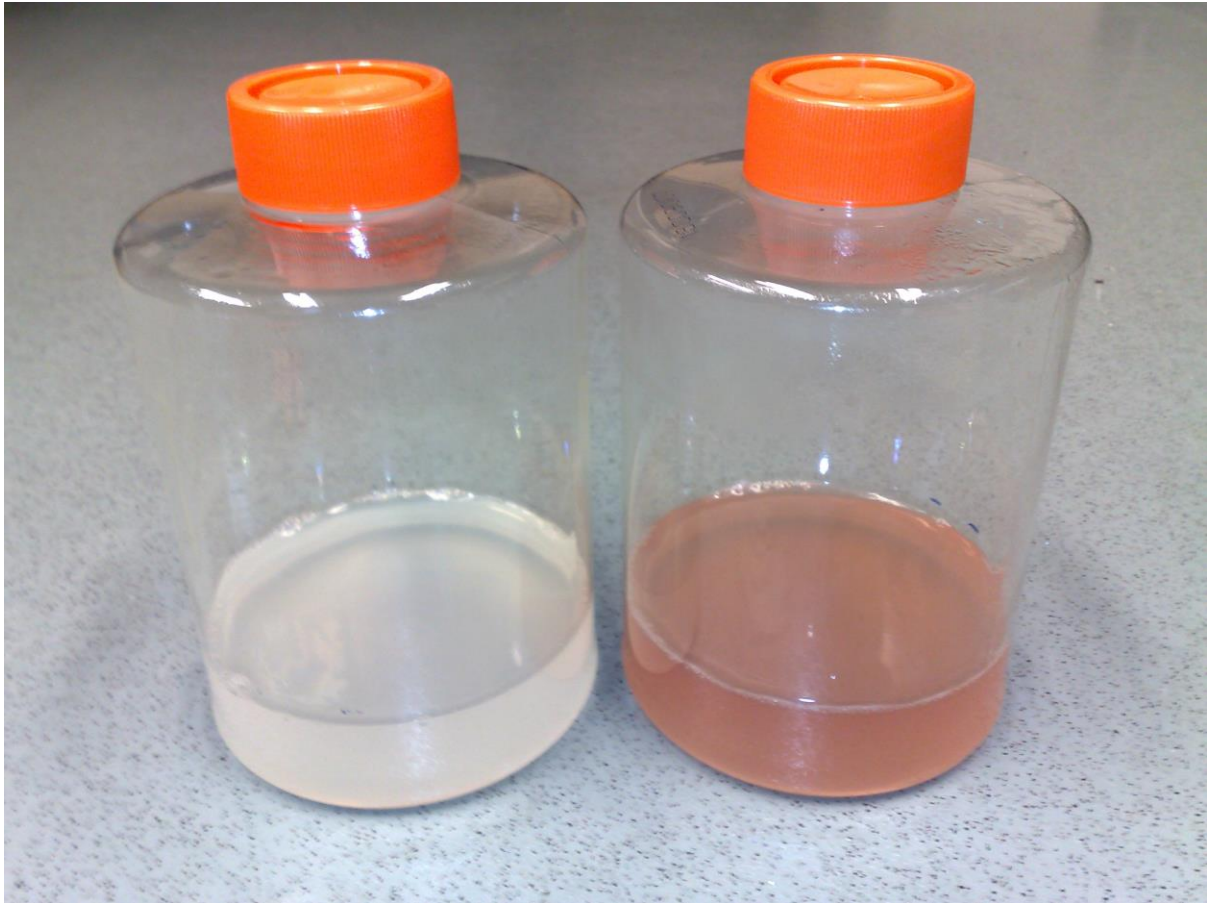

Supplementary Figure 1: Cultures of *Mycobacterium smegmatis* grown on minimal medium containing cholesterol as carbon source are coloured when HsaD is deleted. Wildtype (WT) – on the left and  $\Delta HsaD$  on the right. *Mycobacterium smegmatis* were grown in 7H9 (containing 50 $\mu$ g/ml hygromycin for knockout) to an OD=1, washed twice with sterile PBS and then used to inoculate (1/100 dilution) a 200mL culture of minimal medium containing 0.05% (v:v) EtOH, 0.05% (v:v) tyloxapol and 50 $\mu$ g/ml cholesterol and grown at 37°C for 36 hours.
