# Supplementary material
Source: PubMed Central journal article supplement (PMC5481647)
Supplement: BPH-174-2209-s002.pdf [file BPH-174-2209-s002.pdf]

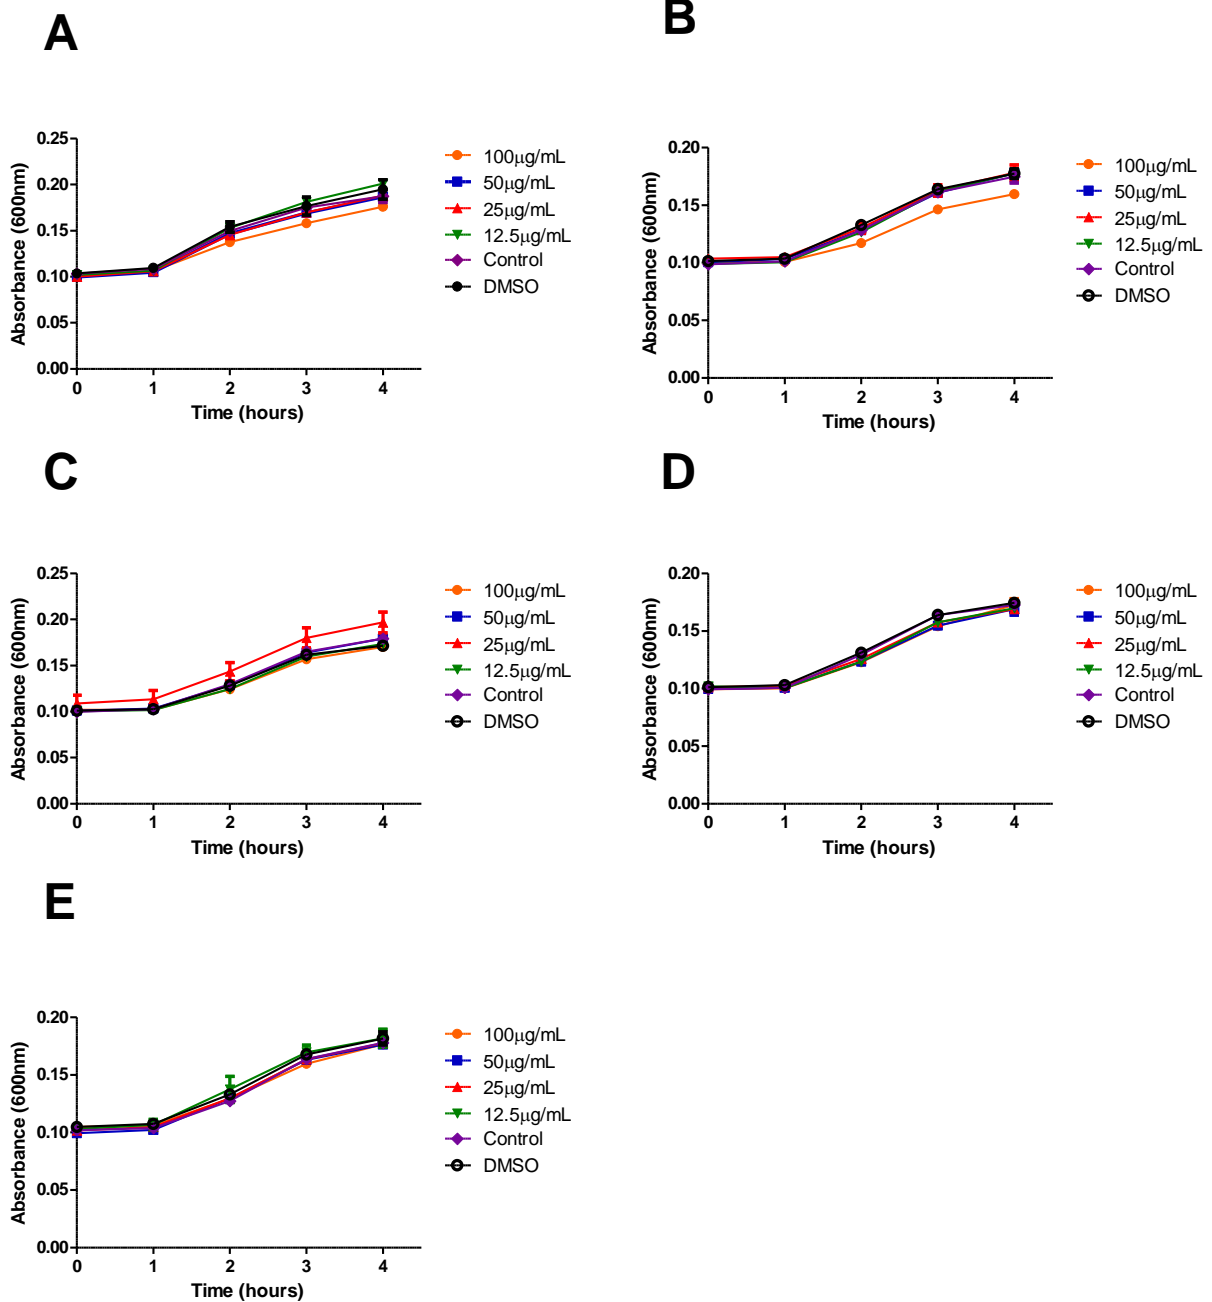

**Supplementary figure 2: Effect of fragments on the growth of *E. coli* JM109 in LB medium** (A) fragment 2; (B) fragment 24; (C) fragment 27; (D) fragment 32; and (E) fragment 6. Liquid cultures in LB were diluted to an OD 600 of 0.1 and fragments were added Briefly, an overnight culture was sub-cultured and was diluted to an OD<sub>600</sub> of 0.1 in LB containing 12.5 µg/mL, 25 µg/mL, 50µg/mL, or 100 µg/mL of fragments. Absorbance readings at 600nm represent means of triplicates ± S.D.
