# Supplementary material
Source: PubMed Central journal article supplement (PMC5481647)
Supplement: BPH-174-2209-s003.pdf [file BPH-174-2209-s003.pdf]

| Fragment | Fragment name                                          | IC <sub>50</sub> /mM |
|----------|--------------------------------------------------------|----------------------|
| 1        | 4-((1H-benzo[d][1,2,3] triazol-1-yl)methyl) morpholine | ND                   |
| 2        | 3,5,-dichloro-benzenesulfonamide                       | 0.41 ±0.02           |
| 3        | methyl 4-aminothiophene-3-carboxylate                  | *                    |
| 4        | 3-chlorothiophene-2-carboxylic acid                    | *                    |
| 5        | 7-chloro-4-(piperazin-1-yl)quinolone                   | *                    |
| 6        | ethyl 3,5-dichloro-4-hydroxybenzoate                   | 0.52±0.02            |
| 7        | 4-(piperidin-1-ylsulfonyl)aniline                      | *                    |
| 8        | Benzenesulfonamide                                     | no inhibition        |
| 9        | 3-chlorobenzenesulfonamide                             | 5.0 ±0.4             |
| 10       | 3,5-difluorobenzenesulfonamide                         | no inhibition        |
| 11       | 2,5-dichlorobenzenesulfonamide                         | 1.89 ±0.10           |
| 12       | 3,5-bis(trifluoromethyl) benzenesulphonamide           | ND                   |
| 13       | 4-chlorobenzenesulfonamide                             | no inhibition        |
| 14       | 3-bromobenzenesulfonamide                              | 2.69 ±0.3            |
| 15       | 4-sulfamoylbenzoic acid                                | no inhibition        |
| 16       | 3-nitrobenzenesulfonamide                              | *                    |
| 17       | 4-nitrobenzenesulfonamide                              | no inhibition        |
| 18       | 3-aminobenzenesulfonamide                              | no inhibition        |
| 19       | p-aminobenzenesulfonamide                              | No inhibition        |
| 20       | 3-methoxybenzenesulfonamide                            | *                    |
| 21       | 4-methoxybenzenesulfonamide                            | *                    |
| 22       | 4-hydroxybenzenesulfonamide                            | no inhibition        |
| 23       | p-toluenesulfonamide                                   | no inhibition        |
| 24       | 3,5-dichlorosulfanilamide                              | 0.16 ±0.01           |
| 25       | 2,5-dichloro-N,N-dimethylsulanilamide                  | 3.39 ±0.18           |
| 26       | 3,5-dibromosulfanilamide                               | 2.10 ±0.11           |
| 27       | 3,5-dichloro-4-hydroxybenzenesulphonate                | 0.27 ±0.01           |
| 28       | 3,5-dichlorobenzoate                                   | no inhibition        |
| 29       | 3-chloro-4-hydroxybenzoate                             | no inhibition        |
| 30       | p-hydroxy benzoate                                     | no inhibition        |
| 31       | methyl 3,5-dichloro-4-hydroxybenzoate                  | 0.71 ±0.02           |
| 32       | 3,5-dichloro-4-hydroxybenzoate                         | 0.54 ±0.01           |
| 33       | 4-amino-3,5-dichlorobenzoate                           | 0.55 ±0.01           |

|    |                             |               |
|----|-----------------------------|---------------|
| 34 | 3,5-dichlorobenzamide       | *             |
| 35 | 1,3-dichloro-6-nitrobenzene | 2.09 ±0.15    |
| 36 | 4-amino benzoic acid        | *             |
| 37 | m-aminobenzoic acid         | no inhibition |

Table 1 Supplementary Inhibition of HsaD enzymic activity by a sublibrary of compounds based on fragments 2 and 6 from the initial screen (Table 1).

The values for IC<sub>50</sub> were determined from the inhibition of HsaD enzymic activity by the fragments as indicated in Materials and Methods. The values shown are averages +/- standard deviation of six independent determinations (N=6). No inhibition indicates that the compounds were not inhibitory at either 5mM or at the highest soluble concentration which could be obtained. The \* indicates that inhibition was observed but that it did not reach 50%.
